# Supplementary material for: Standardization and validation of real time PCR assays for the diagnosis of histoplasmosis using three molecular targets in an animal model
Source: PubMed Central journal article supplement (PMC5747470; doi:10.1371/journal.pone.0190311), 2017-12-29
Supplement: pone.0190311.s001.pdf [file pone.0190311.s001.pdf]

Seaview text-only output

1

```

AJ005963rev  CAATGTCCGT TCACCAAGGT ATCCCACAGC ATCACGGAGG TATTCGGGAG ACGCGGGGAG TTGCAAGAAG
1000          .....
1001          .....
1003          .....
1006          .....
1008          .....
2134          .....
2212          .....
2350          ...C.....
2353          .....
2360          .....
2365          .....
2367          .....
2404          .....
2431          .....
2433          .....
2444          .....
2472          .....
4741          .....
5823          .....

```

71

```

AJ005963rev  GAGAGAACTG TATCGGTGGC TTGGGGTCGA ATTTTCTGCA CGGAAAAC TGCGCTGCGTG AGAGGCCGGA
1000          .....
1001          .....
1003          .....
1006          .....
1008          .....
2134          .....
2212          .....
2350          .....
2353          .....
2360          .....
2365          .....
2367          .....
2404          .....
2431          .....
2433          .....
2444          .....
2472          .....
4741          .....
5823          .....

```

141

```

AJ005963rev  GCGGGTCCA CGGAACGGTT TCGGAGTTGC CGTAGTCGAT GTAAACGACG TCGGCTTTTT TCGCTTCACG
1000          .....
1001          .....
1003          .....
1006          .....
1008          .....
2134          .....
2212          .....
2350          .....
2353          .....
2360          .....
2365          .....
2367          .....
2404          .....

```

```

2431 .....
2433 .....
2444 .....
2472 .....
4741 .A.....
5823 .A..... ..T.....

```

```

211
AJ005963rev GTCGTTTCTC CGTATTTTTG CGCGGTACCA CTCGTTGTCC TCCGTGAACC TGGCCGCGAC TAGATCTCCG
1000 ...A.....
1001 .....
1003 ...A.....
1006 ...A.....
1008 ...A.....
2134 .....
2212 .....
2350 .....
2353 .....
2360 .....
2365 .....
2367 .....
2404 ...A.....
2431 .....
2433 .....
2444 .....
2472 ...A.....
4741 .....G.
5823 ..... C.....

```

```

281
AJ005963rev GCCTTGGGTG GGCCGCTCAG AG
1000 .....
1001 .....
1003 .....
1006 .....
1008 .....
2134 .....
2212 .....
2350 .....
2353 .....
2360 .....
2365 .....
2367 .....
2404 .....
2431 .....
2433 .....
2444 .....
2472 .....
4741 .....G. CC.....
5823 .....

```
