# Supplementary material for: Standardization and validation of real time PCR assays for the diagnosis of histoplasmosis using three molecular targets in an animal model
Source: PubMed Central journal article supplement (PMC5747470; doi:10.1371/journal.pone.0190311), 2017-12-29
Supplement: pone.0190311.s002.pdf [file pone.0190311.s002.pdf]

Seaview text-only output

```

1
U20346rev  GAGGAGCACC GAGATAAAGG TGTCGACGTT G--T-ATTGG GCCCTGTGGT TGGACCGTTG GGCAGGTCGC
1001      .....          .....          .....          ....G..... .T.....
2763      .....          .....          .....          .....          .T.....
2212      .....          .....          .....          .A..T..... .T.....
5822      .....          .....          .....          .A..T..... .T.....
2357      .....          .....          .....          ....T..... .T.....
2349      .....          .....          .....          .....          .....
2368      .....          .....          .....          .....          .....
2475      .....          .....          .....          .....          .....
1006      .....          .....          .....          ....G..... .....
2474      .....          .....          .....          .....          .....
2358      .....          .....          .....          .....          .....
2433      .....          .....          .....          .....A..... .....
2359      .....          .....          .....          .A..T..... .....
2365      .....          .....          .....          .A..T..... .....
2363      .....          .....          .....          .A..T..... .....
2434      .....          .....          .....          ....T..... .....
2404      .....          .....          .....          ....T..... .....
2431      .....          .....          .....          ....T..... .....
2472      .....          .....          .....          ...-T..... .....
1008      .....          .....          .....          ....T..... .....
2436      .....          .....          .....          .....          .....
1003      .....          .....          .....          .....          .....
2444      .....          .....          .....A. TG.-T..... .T.....
4741      .....          .....          .....- TG.-T..... .T.....
5823      .....          .....          .....AA.T..... .T.....
2134      .....          .....          .....- -T.GT..... .T.....
2350      .....          .....          .....G AT.GT..... .T.....
2367      .....          .....          .....- -T.GT..... .T.....
2355      .....          .....          .....T.-T..... .T.....
2352      .....          .....          .....- .GT..... .T.....
2353      .....          .....          .....A TG.GT..... .T.....

```

```

71
U20346rev  CAGATGGAGG GCGGAATTGG GAAGGTTTCA GCCCTGATCC TGTC AATTCC GGGCTCCTTG TTGCGGAGAC
1001      .....          .....          .....          .....          .....          .....          .....A.....
2763      .....          .....          .....          .....          .....          .....          .....A.....
2212      .....          .....          .....          .....          .....          .....          .....A.....
5822      .....          .....          .....          .....          .....          .....          .....A.....
2357      .....          .....          .....          .....          .....          .....          .....A.....
2349      .....          .....          .....          .....          .....          .....          .....
2368      .....          .....          .....          .....          .....          .....          .....
2475      .....          .....          .....          .....          .....          .....          .....
1006      .....          .....          .....          .....          .....          .....          .....
2474      .....          .....          .....          .....          .....          .....          .....
2358      .....          .....          .....          .....          .....          .....          .....
2433      .....          .....          .....          .....          .....          .....          .....
2359      .....          .....          .....          .....          .....          .....          .....
2365      .....          .....          .....          .....          .....          .....          .....
2363      .....          .....          .....          .....          .....          .....          .....
2434      .....          .....          .....          .....          .....          .....          .....
2404      .....          .....          .....          .....          .....          .....          .....
2431      .....          .....          .....          .....          .....          .....          .....

```

```

2472 .....
1008 .....
2436 .....
1003 .....
2444 .....
4741 .....
5823 .....A.....T.....
2134 .....
2350 .....
2367 .....
2355 .....
2352 .....
2353 .....A.....A.....

```

141

```

U20346rev CATCAAGGGA ATTCAAAGTG CCGGCGTCAT TGCTTGTGTC AAGCATTTC TAGGCAACGA GCAAGAACGA
1001 .....A.....G...
2763 .....A.....G...
2212 .....A.....G...
5822 .....A.....G...
2357 .....A.....G...
2349 .....G...
2368 .....G...
2475 .....G...
1006 .....G...
2474 .....G...
2358 .....G...
2433 .....G...
2359 .....G...
2365 .....G...
2363 .....G...
2434 .....G...
2404 .....G...
2431 .....G...
2472 .....G...
1008 .....
2436 .....
1003 .....G...
2444 .....G...
4741 .....G...
5823 .....A.....G...
2134 .....G...
2350 .....G...
2367 .....G...
2355 .....G...
2352 .....G...
2353 .....G...

```

211

```

U20346rev TTCCGCCAAG GCCCTGAGGC TCAAGGGTAT GGTTTCGATA TCTCAGAGAG T--TCAAGTT CCAATATTGA
1001 .....G.....
2763 .....G.....
2212 .....G.....
5822 .....G.....CA.....
2357 .....G.....

```



|      |       |       |
|------|-------|-------|
| 2350 | ..... | ..... |
| 2367 | ..... | ..... |
| 2355 | ..... | ..... |
| 2352 | ..... | ..... |
| 2353 | ..... | ..... |
