# Supplementary material for: Standardization and validation of real time PCR assays for the diagnosis of histoplasmosis using three molecular targets in an animal model
Source: PubMed Central journal article supplement (PMC5747470; doi:10.1371/journal.pone.0190311), 2017-12-29
Supplement: pone.0190311.s003.pdf [file pone.0190311.s003.pdf]

Seaview text-only output

```
1
1001 CCCATCGCTT GATCCCAAC GCGGCGTGAA CATGACCTAT TCCGGCGCCG ACGGCTCGAT CTCGATGCC
4741 ..... T.....T
1006 .T.....
2472 .T.....
1000 .T.....
2404 .T.....
2436 .T.....
1008 .T.....
1003 .T.....
2434 .T.....
2474 .T.....
5822 .T.....
2475 .....
2212 .....
2360 T.....
5823 .....
2350 .....
2352 .....
2433 T.....
2444 .....
2358 .....
2365 .....
2357 .....
2367 .....
2363 .....
2349 .....
2353 .....
```

71

```
1001 GTGATCGTCG TCGGCGGCCT GCTCACGAGC GCCTCAACGC AATACCCAAC GGGTCGCCCCG CTCAGGATTA
4741 ..... A.....
1006 ..... G A.....
2472 ..... G A.....
1000 ..... G A.....
2404 ..... G A.....
2436 ..... G A.....
1008 ..... G A.....
1003 ..... G A.....
2434 ..... G A.....
2474 ..... G A.....
5822 ..... G A.....
2475 ..... G A.....
2212 .....
2360 ..... T. .C. .A. ....
5823 .....
2350 .....
2352 .....
2433 ..... T. .C. .A. ....
2444 ..... T. .... T. ....
2358 ..... A. ....
2365 ..... A. .... A. ....
2357 ..... A. ....
2367 ..... A. .... A. ....
2363 ..... A. .... A. ....
2349 ..... A. .... A. ....
2353 .....
```

141

|      |            |            |            |            |    |
|------|------------|------------|------------|------------|----|
| 1001 | TTACGGATGC | ATACGCGTAT | GGAAAGCCCG | TTGGCGCCGT | CG |
| 4741 | .....      | .....      | .....      | .....      | .. |
| 1006 | .....      | .....      | .....      | .....      | .. |
| 2472 | .....      | .....      | .....      | .....      | .. |
| 1000 | .....      | .....      | .....      | .....      | .. |
| 2404 | .....      | .....      | .....      | .....      | .. |
| 2436 | .....      | .....      | .....      | .....      | .. |
| 1008 | .....      | .....      | .....      | .....      | .. |
| 1003 | .....      | .....      | .....      | .....      | .. |
| 2434 | .....      | .....      | .....      | .....      | .. |
| 2474 | .....      | .....      | .....      | .....      | .. |
| 5822 | .....      | .....      | .....      | .....      | .. |
| 2475 | .....      | .....      | .....      | .....      | .. |
| 2212 | .....      | .....      | .....      | .....      | .. |
| 2360 | .....      | ...A.....  | .....      | .....      | .. |
| 5823 | .....      | .....      | .....      | .....      | .. |
| 2350 | .....      | ...AT..... | .....      | .....      | .. |
| 2352 | .....      | ...AT..... | .....      | .....      | .. |
| 2433 | .....      | ...A.....  | .....      | .....      | .. |
| 2444 | ...T.....  | .....      | .....      | ...C.....  | .. |
| 2358 | .....      | .....      | .....      | .....      | .. |
| 2365 | .....      | .....      | .....      | .....      | T. |
| 2357 | .....      | .....      | .....      | .....      | T. |
| 2367 | .....      | .....      | .....      | .....      | T. |
| 2363 | .....      | .....      | .....      | .....      | T. |
| 2349 | .....      | .....      | .....      | .....      | T. |
| 2353 | .....      | .....      | .....      | .....      | .. |
